# Supplementary material for: Novel role of AMPK in cocaine reinforcement via regulating CRTC1
Source: Research Square preprint supplement (doi:10.21203/rs.3.rs-1961394/v1), 2022-08-23
Supplement: Supplementary file 1 [file fd9119328306f1b5c8a437e6.docx]

Aug 14, 2022, an original article for *Translational Psychiatry*

**Supplementary Information**

**Novel role of AMPK in cocaine reinforcement via regulating CRTC1**

**Xiaoxing Liu, Ph.D.,1 Fanglin Liu, B.S.,2 Xin Li, B.S.,2 Tangsheng Lu, M.D.,2** **Yixiao Luo, Ph.D.,2, 3 Min Jian, Ph.D.,2 Kai Yuan, Ph.D.,1 Shiqiu Meng, Ph.D.,2 Yanping Bao, Ph.D.,2, 4 Jie Shi, Ph.D.,2 Lin Lu, M.D., Ph.D.,1, 5 Ying Han, Ph.D.,2, ***

**This file includes:**

**Supplementary Figure Legends**

**Supplementary Figure Legends**

**
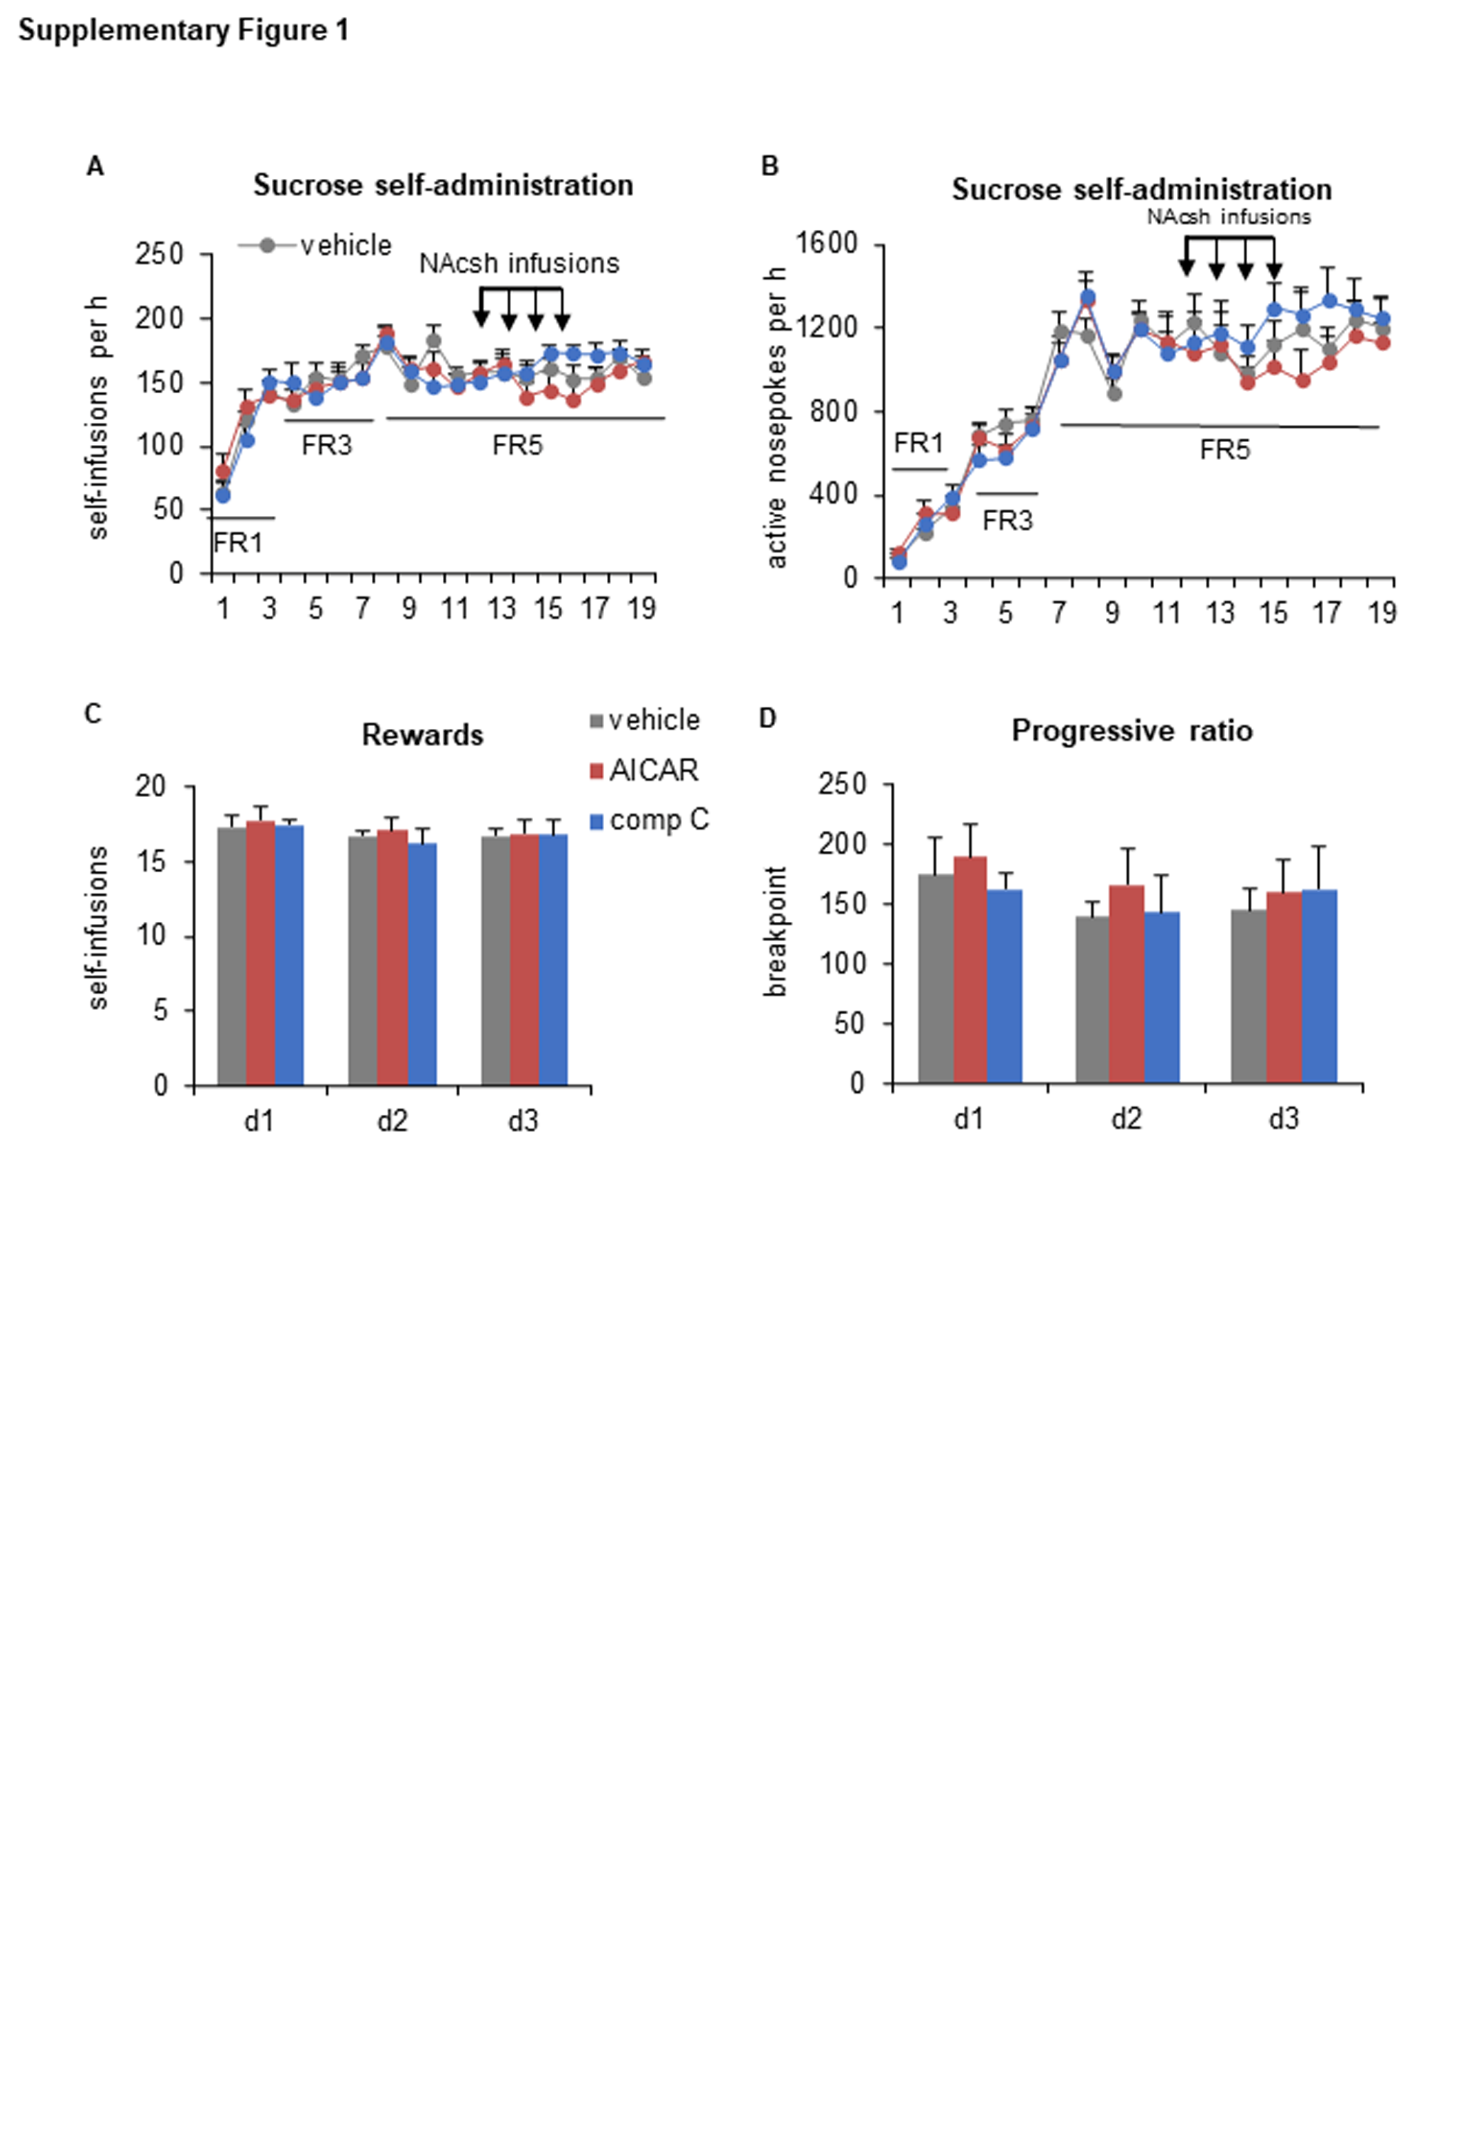
**

**Supplementary Figure 1. Modulation of AMPK activity in the NAcsh fails to alter motivation for natural reward.** **A and B**, Repeated infusions of AICAR (2.5 μg/0.5 ml/side) or compound C (1.5 μg/0.5 ml/side) in the NAcsh had no effect on sucrose self-administration rates on an FR5 schedule after the cessation of treatment (*n* = 9-10/group). **C**, Repeated intra-NAc infusions of AICAR or compound C in the NAcsh had no effect on the number of sucrose rewards earned over 2 h of operant testing. **D**, Repeated intra-NAcsh infusions of AICAR or compound C had no effect on progressive-ratio responding for sucrose in over 2 h of operant testing. The data are expressed as mean ± SEM.
